# Supplementary material for: N-Glycosylation of LRP6 by B3GnT2 Promotes Wnt/β-Catenin Signalling
Source: MDPI journal article supplement (doi:10.3390/cells12060863), 2023-03-10
Supplement: s1 [file s1]

## Supplementary Figure S1

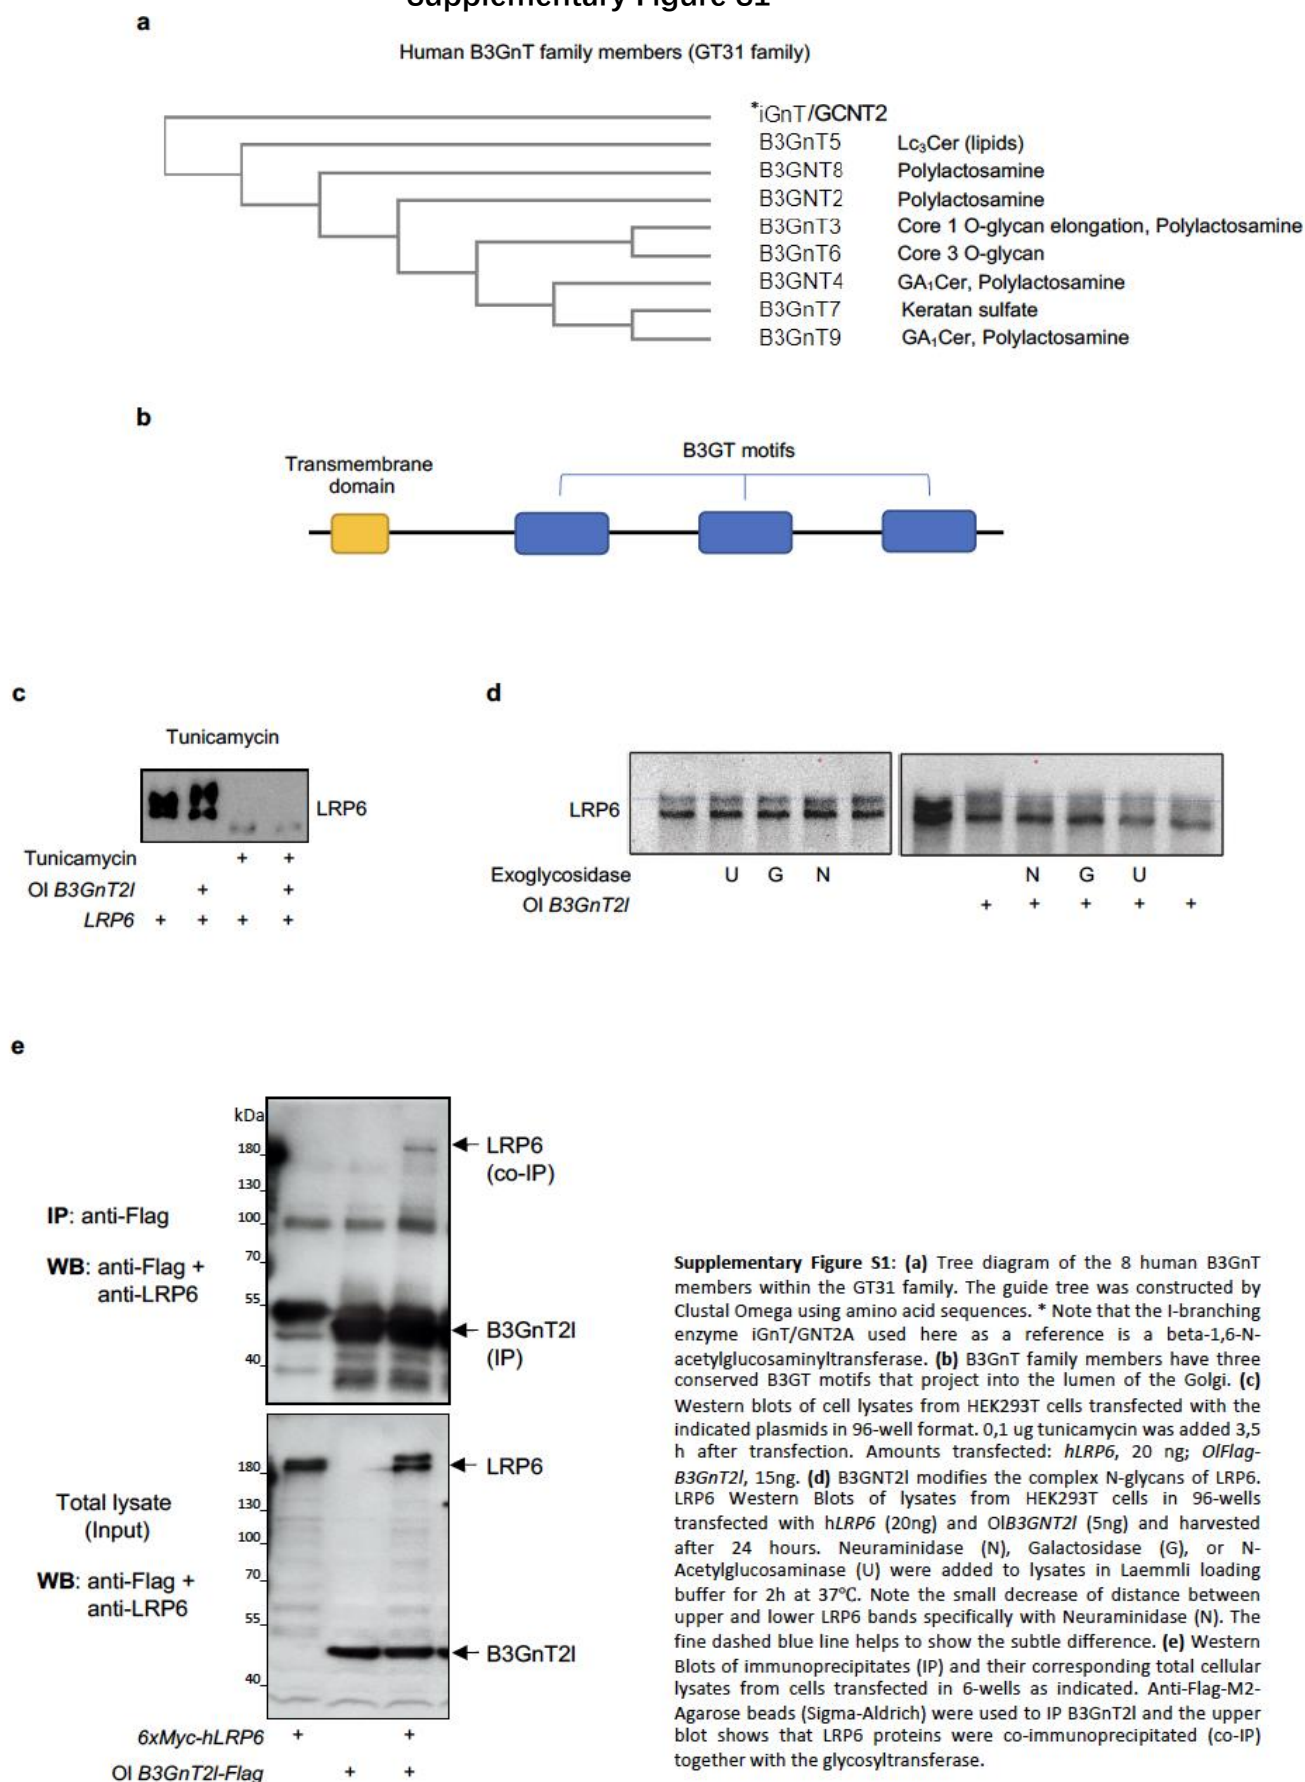

Supplementary Figure S2

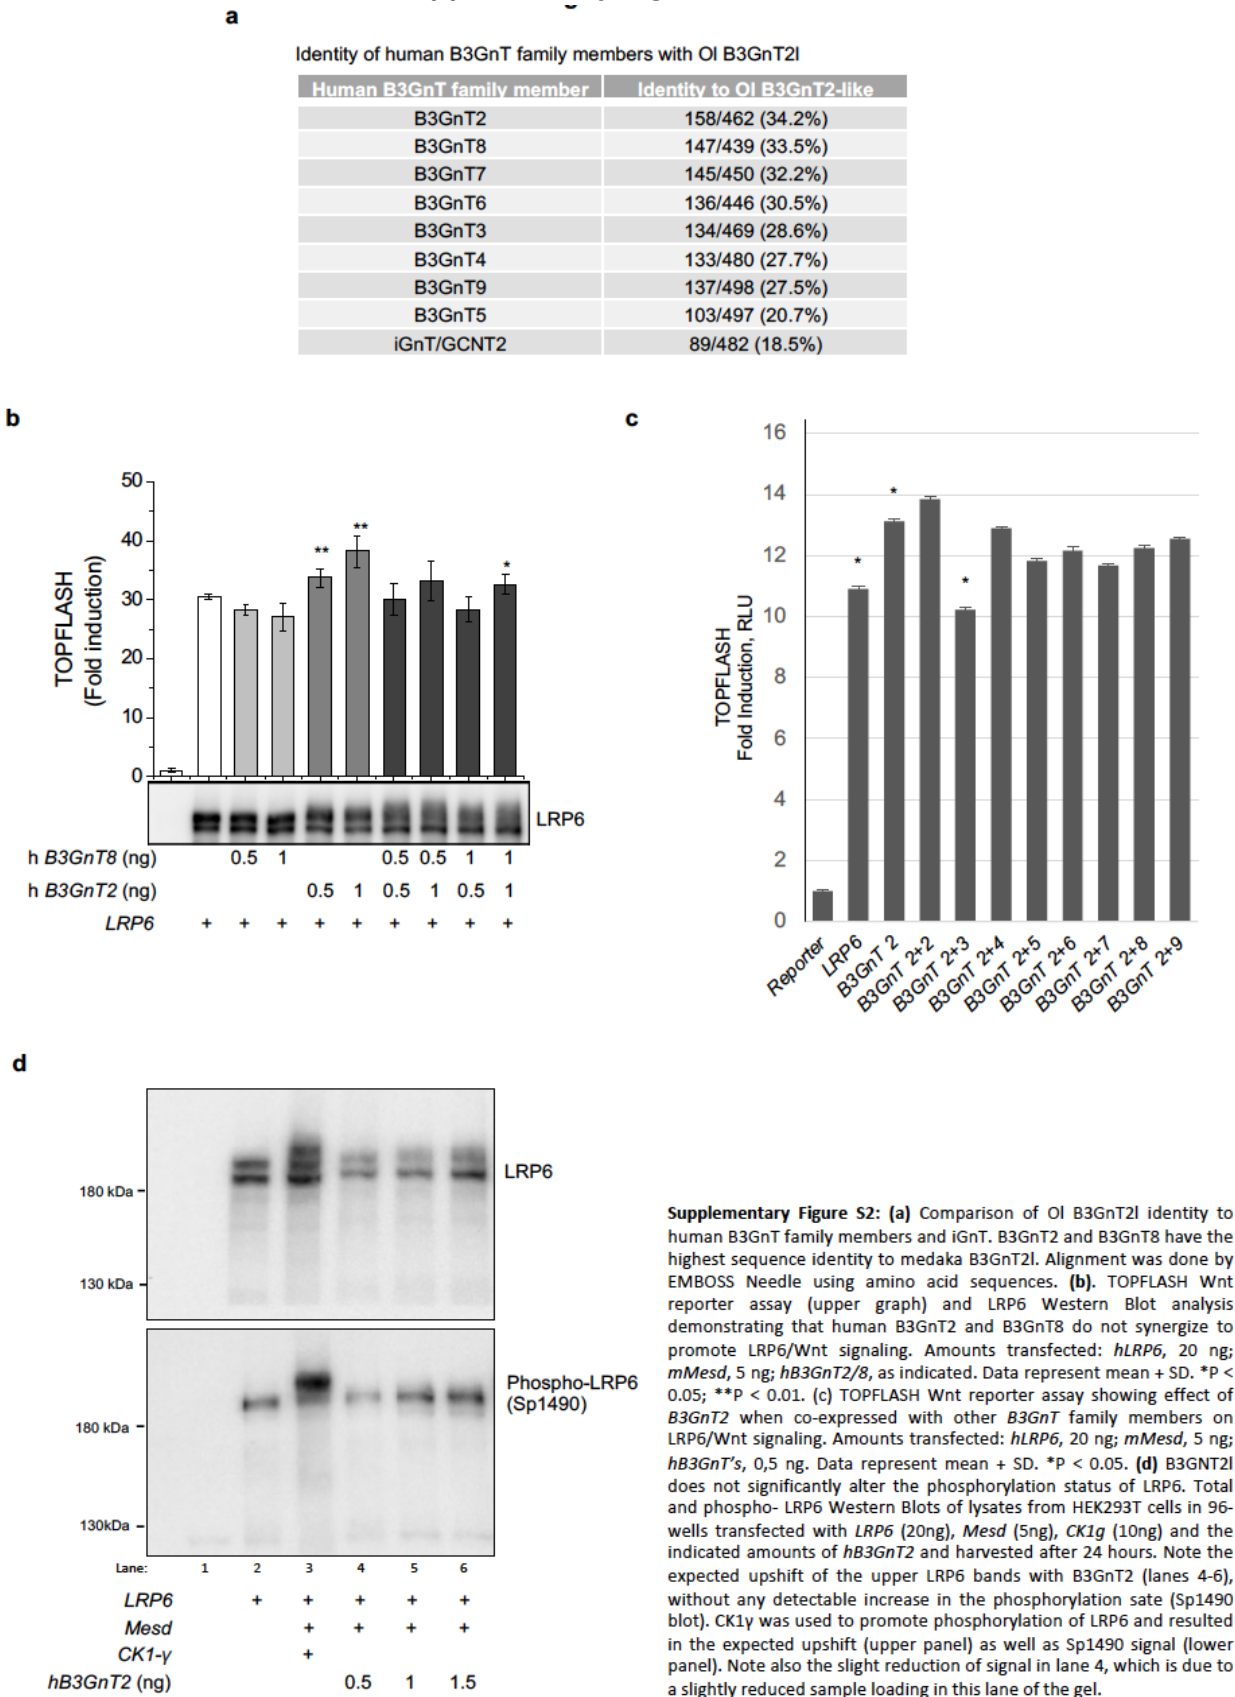

## Supplementary Figure S3

a

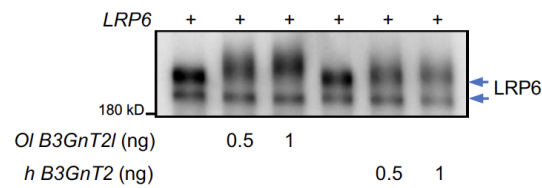

b

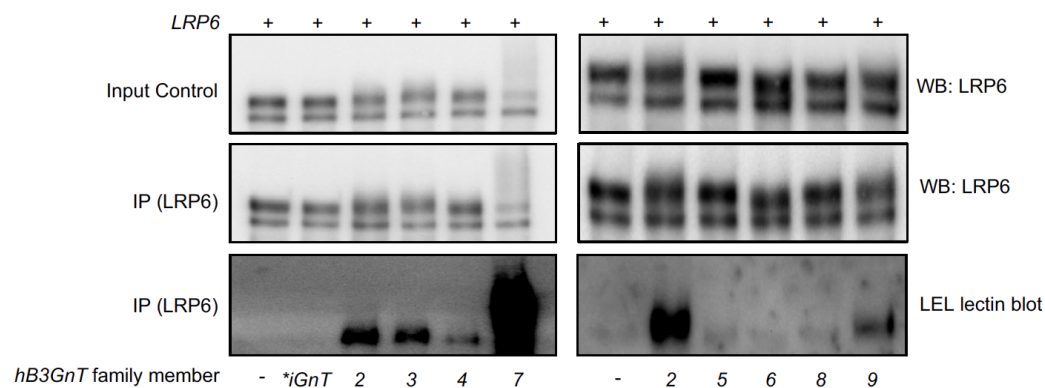

c

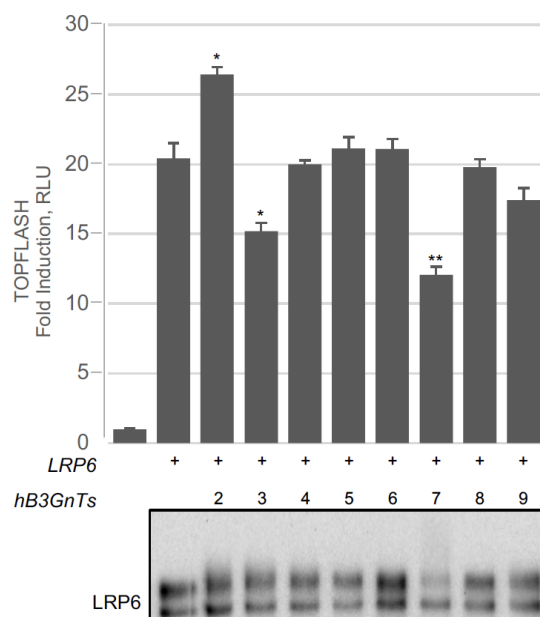

**Supplementary Figure S3:** (a) Western blots of cell lysates from HEK293T cells transfected with indicated plasmids in 96-well format, showing that *OI B3GnT2I* has stronger modification activity than human B3GnT2. Amounts transfected: *hLRP6*, 20 ng; *OI B3GnT2I*, human *B3GnT2*, as indicated. (b) LEL lectin blot analysis of LRP6 using all 8 human B3GnT family members. LRP6 Western blots and lectin blots of cell lysates from HEK293T cells transfected with indicated plasmids in 6-well format. Amounts transfected: *hLRP6*, 600 ng; *mMesd*, 450 ng; *hB3GnTs*, 30 ng. \* Note that the I-branching enzyme *iGnT/GNT2A* used here as a reference control is a beta-1,6-N-acetylglucosaminyltransferase. (c) TOPFLASH Wnt reporter assay (top graph) and LRP6 Western Blot (lower panel) showing the effect of all human B3GnT members on LRP6 modification and Wnt/ $\beta$ -catenin signaling. Amounts transfected: *hLRP6*, 20 ng; *mMesd*, 5 ng; *hB3GnTs*, 0.5 ng. (d) MS fragmentation spectrum of the N-glycopeptide  $[M+3H]^{3+}$  at  $m/z$  1209.4530 (see Figure 3c, N433)

d

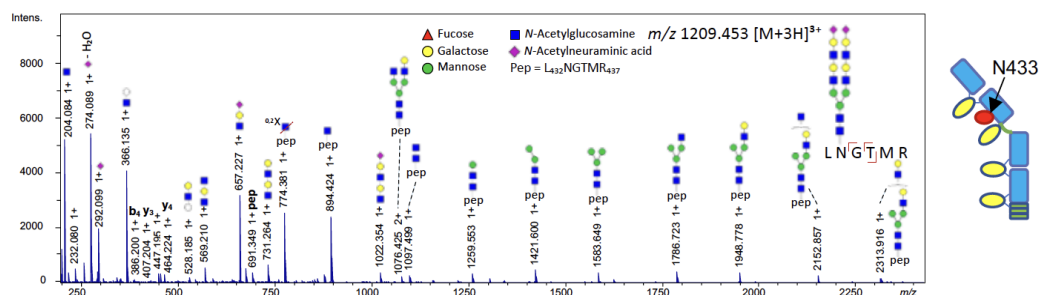

Supplementary Figure S4

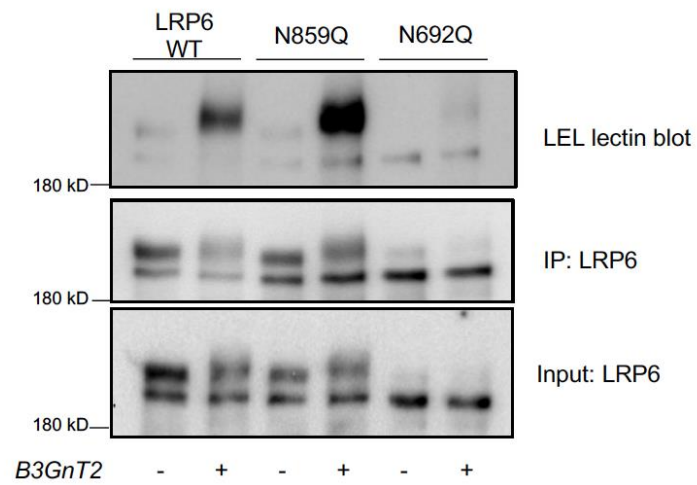

**Supplementary Figure S4:** LRP6 Glycosylation site Mutant N859Q shows enhanced B3GnT2-mediated poly-lactosamines modification. Western blot and lectin blots of IP's from HEK293T cells transfected as indicated in 6-well plate. Amounts transfected: indicated *hLRP6*, 600 ng; *mMesd*, 150 ng; *hB3GnT2*, 30 ng.

Supplementary Figure S5

a

Lentiviral plasmids

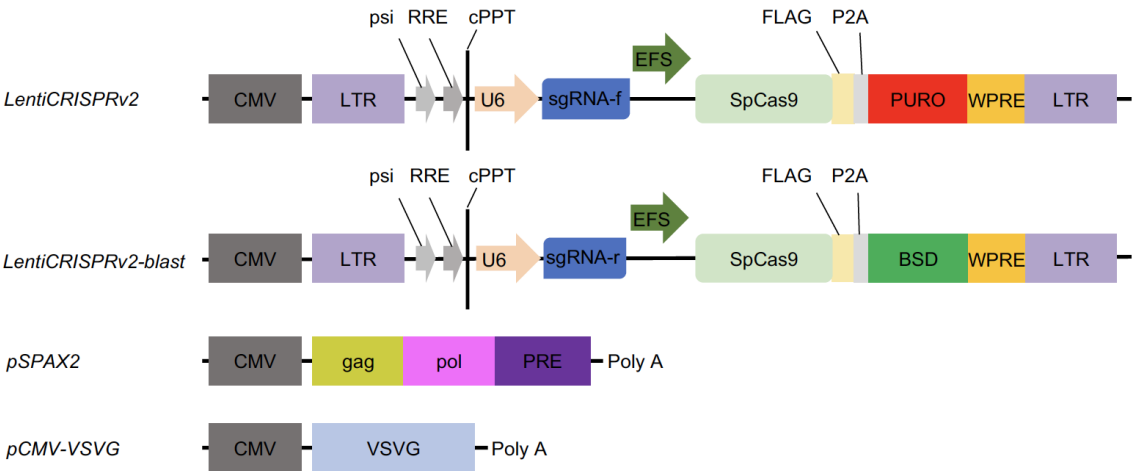

b

Lentiviral based CRISPR/Cas9 gene knock out

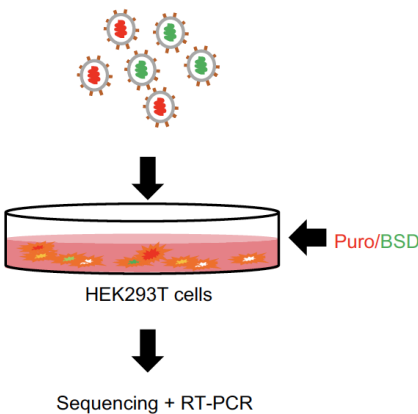

d

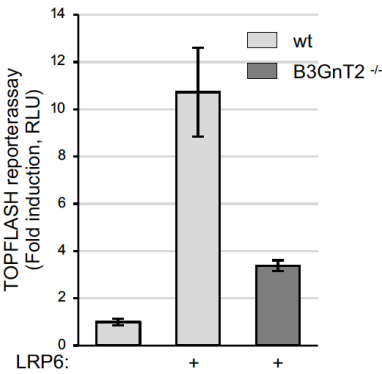

c

B3GnT2 transcription analysis

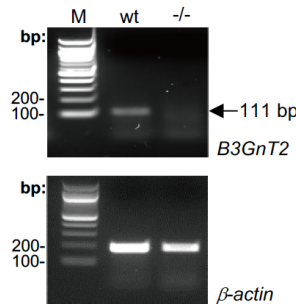

e

Sanger sequencing analysis

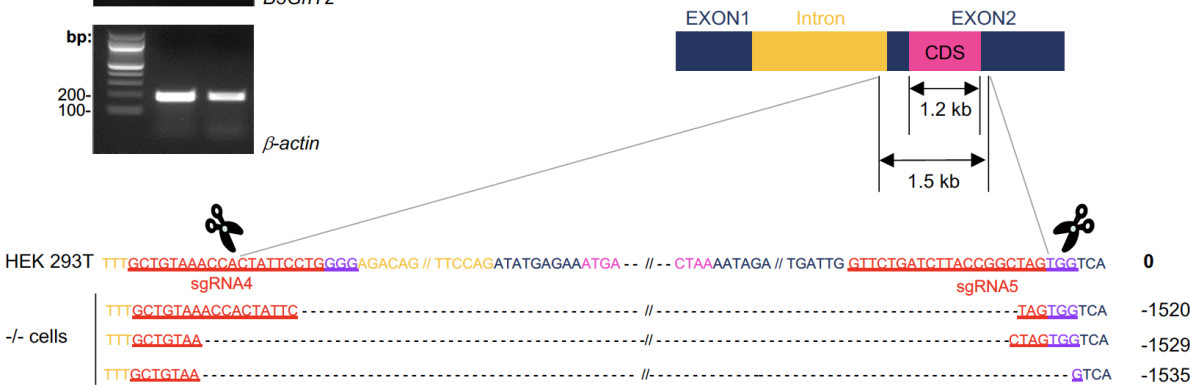

## Supplementary Materials: Xu et al. 2023

**Supplementary Figure S5:** lentiviral mediated CRISPR-Cas 9 ablation of human *B3GnT2* gene. **(a)** Lentiviral CRISPR-Cas9 vectors used. CMV, cytomegalovirus immediate early promoter; LTR, long terminal repeat; psi+, HIV-1 packaging signal psi; RRE, HIV-1 response element; cPPT, central polypurine tract; U6, RNA polymerase III promoter; sgRNAF/R, single guide RNA forward/reverse; EFS, elongation factor 1 $\alpha$  short promoter; spCas9, Cas9 endonuclease from the *Streptococcus pyogenes* Type II CRISPR/Cas system; Flag, Flag tag; P2A, 2A self-cleaving peptide; Puro, Puromycin resistance gene; BSD, blastincidin resistance gene; WPRE, Woodchuck hepatitis virus posttranscriptional regulatory element; gag, lentiviral structural protein; pol, precursor protein encoding viral protease, reverse transcriptase and integrase; PRE, HIV-1 rev response element; VSVG, vesicular stomatitis virus G protein gene; Poly A, polyadenylation signal. **(b)** Schematic of Lentiviral based CRISPR/Cas9 gene knock out workflow. HEK 293T cells were infected with two kinds of lentiviral harbouring the Cas9 and a pair of sgRNAs cutting both end of gene CDS region. The infected cells undergo dual antibiotic selection and quickly checked for the CDS region deletion result. After confirmation of expected deletion in the mixed cell pool, cells were subjected to limited dilution for single colony and genotyping PCR screening steps. The selected gene KO hits were further verified by transcription analysis and Sanger sequencing analysis. **(c)** Transcription analysis for B3GnT2 mRNA expression level on selected hits. B3GnT2 wt allele has a PCR product of 111 bp. **(d)** TOPFLASH reporter assay in HEK293T wild-type and B3GnT2<sup>-/-</sup> cells transfected with *hLRP6* (20 ng) as indicated. Cells were transfected in 96-wells in tetraplicates and cell lysates harvested 24 h post transfection. All error bars shown are standard deviation (SD) from mean. **(e)** Multiple Sanger sequence alignment of CDS region from B3GnT2 KO clones and HEK 293T wt cells. Gene and sgRNA structure of B3GnT2 were showed in color code. Pink: CDS region; Yellow: Intron sequence; Dark blue: Exon sequence; Red: sgRNA sequence; Purple: PAM sequence.
